# Supplementary material for: Synthesis and Characterization of MgO Thin Films Obtained by Spray Technique for Optoelectronic Applications
Source: MDPI journal article supplement (doi:10.3390/nano11113076), 2021-11-15
Supplement: s1 [file s1]

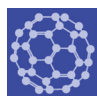

# Supplementary Materials: Synthesis and Characterization of MgO Thin Films Obtained by Spray Technique for Optoelectronic Applications

Maher Tlili <sup>1</sup>, Chayma Nefzi <sup>1</sup>, Badriyah Alhalaili <sup>2</sup>, Chaker Bouzidi <sup>3</sup>, Lassaad Ajili <sup>3</sup>, Neila Jebari <sup>4</sup>, Ruxandra Vidu <sup>5,6,\*</sup> and Najoua Turki Kamoun <sup>1</sup>

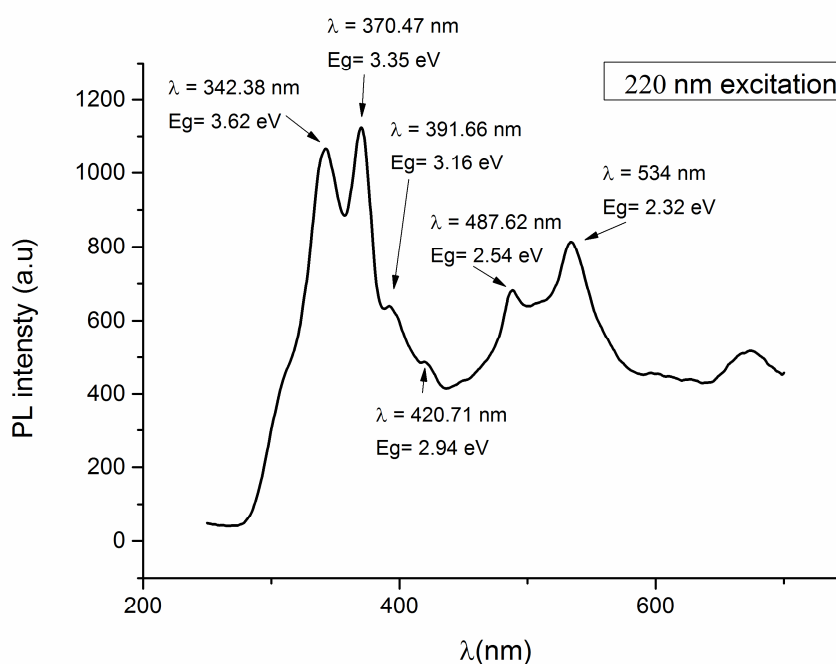

**Figure S1.** PL emission spectrum for 220 nm excitation of MgO thin films prepared with  $[Mg^{2+}] = 0.15 \text{ mol}\cdot\text{L}^{-1}$ .

The emitted radiations are presented in figure 8. We observe the presence of peaks of emissions at: 3.35 eV, 3.16 and 2.32 which are attributed to defect center of type F2, F<sup>+</sup> and F, respectively according to Kotomin et al [29].
